# Supplementary material for: Sediment tolerance mechanisms identified in sponges using advanced imaging techniques
Source: PeerJ. 2017 Nov 16;5:e3904. doi: 10.7717/peerj.3904 (PMC5694653; doi:10.7717/peerj.3904)
Supplement: Figure S1 [file peerj-05-3904-s001.xlsx]

## Sheet: CT_stats_chronic_MR
Sample	Treatment	Tank	Time	internal sediment particle volume (μm3)	internal sediment particles mm‑3	volume of aquiferous system relative to tissue and skeletal volume (%)	Aquiferous system volume (cubic microns)	Volume of tissue and skeleton	Total volume (cubic microns)
C51	High	1	4W	41.9923	21.2356	53.884	7.61232e+07	6.51493e+07	1.41272e+08
C52	High	1	4W	108.339	18.6966	54.1406	8.68723e+07	7.35846e+07	1.60457e+08
C59	High	2	4W	37.0291	514.877	69.6214	8.65404e+07	3.77611e+07	1.24301e+08
C13	Control	3	4W	0	0	64.998	5.56648e+07	2.9976e+07	8.56408e+07
C15	Control	3	4W	0	0	79.7716	1.23057e+08	3.12045e+07	1.54261e+08
C17	Control	4	4W	0	0	80.412	1.24287e+08	3.02757e+07	1.54563e+08
C59R	High	1	Rec	34.6579	44.0859	68.1699	4.63889e+07	2.16601e+07	6.80489e+07
C60R	High	1	Rec	13.4968	23.8618	62.0716	5.20259e+07	3.179e+07	8.38159e+07
C61R	High	2	Rec	0	0	59.6553	4.99642e+07	3.37907e+07	8.37549e+07
C13R	Control	3	Rec	0	0	76.2174	1.01003e+08	3.15166e+07	1.32519e+08
C15R	Control	3	Rec	0	0	73.7387	1.02013e+08	3.63309e+07	1.38344e+08
C17R	Control	4	Rec	0	0	75.5709	1.03023e+08	3.33033e+07	1.36326e+08
