# Supplementary material for: Sediment tolerance mechanisms identified in sponges using advanced imaging techniques
Source: PeerJ. 2017 Nov 16;5:e3904. doi: 10.7717/peerj.3904 (PMC5694653; doi:10.7717/peerj.3904)
Supplement: Figure S2 [file peerj-05-3904-s002.xlsx]

## Sheet: CT_stats_acute_MR
Sample	Treatment	Tank	Time	internal sediment particle volume (μm3)	internal sediment particles mm‑3	volume of aquiferous system relative to tissue and skeletal volume (%)	Aquiferous system volume (cubic microns)	Volume of tissue and skeleton	Total volume (cubic microns)
111	High	1	T1	81.3185	109.79	54.543	1.04327e+08	8.69474e+07	1.91274e+08
112	High	2	T1	17.0811	301.849	36.1562	4.43195e+07	7.82584e+07	1.22578e+08
113	High	3	T1	29.2353	130.035	21.1525	3.41603e+07	1.27335e+08	1.61495e+08
124	High	2	T2	55.8165	640.665	73.5485	1.5498e+08	5.57381e+07	2.10718e+08
122	High	1	T2	57.3911	787.12	51.0098	9.46163e+07	9.08702e+07	1.85486e+08
125	High	3	T2	42.6355	72.2955	59.137	1.14519e+08	7.91311e+07	1.9365e+08
141	High	1	T3	64.9982	491.869	61.3896	1.28553e+08	8.08522e+07	2.09405e+08
142	High	2	T3	34.8281	753.48	39.3685	5.85188e+07	9.01248e+07	1.48644e+08
143	High	3	T3	54.6482	997.821	61.3543	1.37119e+08	8.6368e+07	2.23487e+08
152	High	1	T4	68.3683	51.2112	65.155	1.01782e+08	5.44334e+07	1.56216e+08
153	High	2	T4	43.3444	161.267	59.3036	6.2515e+07	4.29002e+07	1.05415e+08
154	High	3	T4	63.3678	48.3208	60.4453	1.00073e+08	6.54867e+07	1.6556e+08
171	High	1	T5	0	0	52.9702	1.40082e+08	1.24373e+08	2.64455e+08
173	High	2	T5	37.9985	11.3168	49.8396	1.32121e+08	1.32972e+08	2.65093e+08
175	High	3	T5	44.6668	30.1985	52.8013	1.57363e+08	1.40665e+08	2.98029e+08
311	Med	4	T1	62.1563	145.848	56.4844	1.20058e+08	9.24925e+07	2.1255e+08
312	Med	5	T1	79.5837	36.0663	32.4951	9.00983e+07	1.87169e+08	2.77267e+08
313	Med	6	T1	60.8495	88.4219	52.8956	4.18752e+07	3.72906e+07	7.91659e+07
321	Med	4	T2	46.8727	454.611	60.752	1.08244e+08	6.99297e+07	1.78174e+08
322	Med	5	T2	45.6328	220.615	62.8389	1.02541e+08	6.06396e+07	1.6318e+08
325	Med	6	T2	43.7167	630.887	60.119	9.62458e+07	6.38464e+07	1.60092e+08
344	Med	4	T3	35.1339	57.4867	51.5055	6.27168e+07	5.90504e+07	1.21767e+08
343	Med	5	T3	19.9977	22.4797	55.1959	7.36611e+07	5.97929e+07	1.33454e+08
345	Med	6	T3	62.6157	37.6576	61.7665	1.31217e+08	8.12234e+07	2.1244e+08
351	Med	4	T4	0	0	5.53267	2.81723e+06	4.81026e+07	5.09199e+07
354	Med	5	T4	18.3175	106.76	66.2534	1.73763e+08	8.85075e+07	2.62271e+08
355	Med	6	T4	45.3938	41.625	61.464	1.47661e+08	9.25791e+07	2.4024e+08
371	Med	4	T5	20.9959	65.2128	14.7778	6.79826e+06	3.9205e+07	4.60032e+07
374	Med	5	T5	0	0	51.0419	1.1999e+08	1.15091e+08	2.35081e+08
375	Med	6	T5	0	0	4.70134	2.68726e+06	5.44721e+07	5.71594e+07
11	Control	7	T1	0	0	62.1509	6.70596e+07	4.08385e+07	1.07898e+08
13	Control	8	T1	0	0	66.452	1.14981e+08	5.80474e+07	1.73028e+08
15	Control	9	T1	0	0	54.1485	1.78144e+08	1.50848e+08	3.28992e+08
21	Control	7	T2	0	0	60.5422	1.20367e+08	7.8448e+07	1.98815e+08
22	Control	8	T2	0	0	52.6796	1.09177e+08	9.80705e+07	2.07248e+08
23	Control	9	T2	0	0	52.2071	7.82312e+07	7.16167e+07	1.49848e+08
41	Control	7	T3	0	0	61.9647	1.16256e+08	7.13604e+07	1.87616e+08
43	Control	8	T3	0	0	50.1577	8.48651e+07	8.43315e+07	1.69197e+08
45	Control	9	T3	0	0	62.4493	1.25197e+08	7.52806e+07	2.00477e+08
51	Control	7	T4	0	0	56.8042	1.4923e+08	1.13479e+08	2.62709e+08
52	Control	8	T4	0	0	54.1046	6.22321e+07	5.27897e+07	1.15022e+08
53	Control	9	T4	0	0	56.4536	1.29303e+08	9.97402e+07	2.29044e+08
71	Control	7	T5	0	0	63.9526	1.7104e+08	9.64081e+07	2.67448e+08
74	Control	8	T5	0	0	63.225	6.84268e+07	3.98006e+07	1.08227e+08
75	Control	9	T5	0	0	47.6328	1.01937e+08	1.12069e+08	2.14005e+08
